# Supplementary material for: Genomic and Metabolic Features of an Unexpectedly Predominant, Thermophilic, Assistant Starter Microorganism, Thermus thermophilus, in Chinese Inner Mongolian Cheese
Source: MDPI journal article supplement (doi:10.3390/foods10122962), 2021-12-02
Supplement: s1 [file s1]

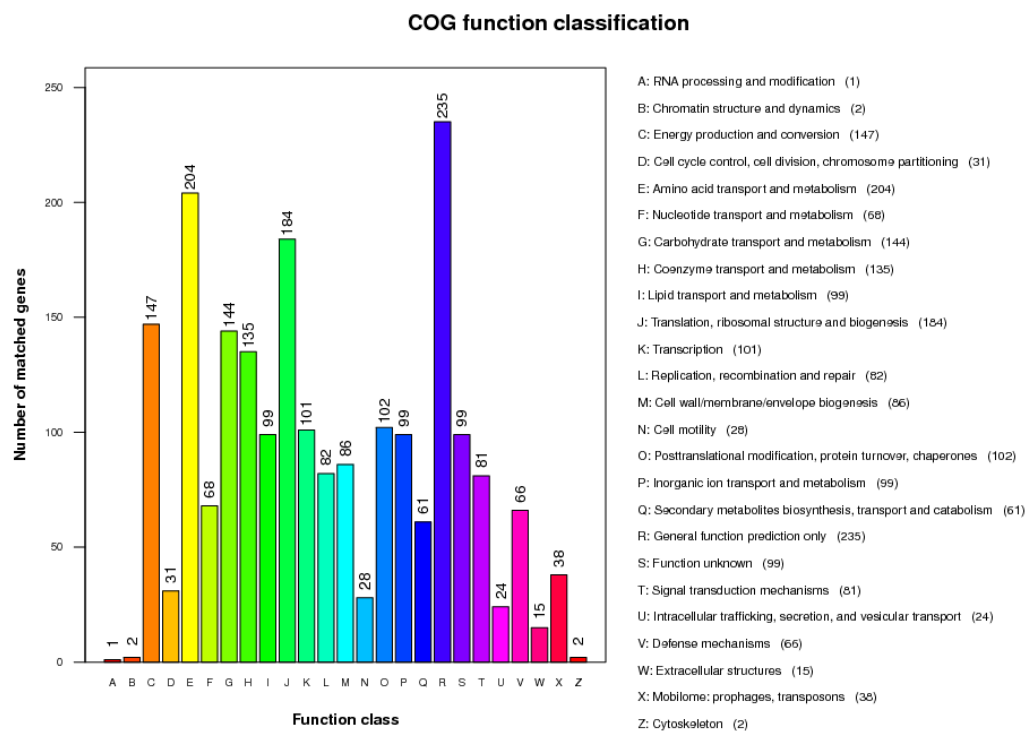

**Figure S1.** COG categories of coding proteins. The X-axis represents the functional classes, and the Y-axis represents the number of predicted proteins in *T. thermophilus* N-1.

**Table S1** The complete genome sequences of *T. thermophilus* N-1, *Lactobacillus plantarum* 10CH, *Lactococcus lactis* SD96, *Streptococcus thermophilus* NCTC 12958, *Leuconostoc mesenteroides* DSM 20484, *Lactobacillus paracasei* NJ and *Lactobacillus fermentum* MTCC 25067, and the main functional genes involved in fermentation.

|                                                           | <i>T.<br/>thermophilus</i> N-1 | <i>Lactobacillus<br/>plantarum</i> 10CH | <i>Lactococcus lactis</i><br>SD96 | <i>Streptococcus<br/>thermophilus</i> NCTC<br>12958 | <i>Leuconostoc<br/>mesenteroides</i><br>DSM20484 | <i>Lactobacillus paracasei</i><br>NJ | <i>Lactobacillus<br/>fermentum</i> MTCC<br>25067 |
|-----------------------------------------------------------|--------------------------------|-----------------------------------------|-----------------------------------|-----------------------------------------------------|--------------------------------------------------|--------------------------------------|--------------------------------------------------|
| Source                                                    | cheese                         | cheese                                  | cheese                            | milk                                                | cheese                                           | yoghourt                             | fermented milk                                   |
| Accession number                                          | CP082323-<br>CP082325          | CP023728                                | CP043518-CP043528                 | LS483339                                            | CP012009-CP012010                                | CP041944                             | AP017973-AP017974                                |
| Genome size                                               | 2.19                           | 3.31                                    | 2.64                              | 2.1                                                 | 1.85                                             | 3.08                                 | 2.01                                             |
| G+C content                                               | 69.72                          | 44.5                                    | 35.3                              | 39                                                  | 38                                               | 46.4                                 | 51.1                                             |
| $\beta$ -galactosidase                                    | +                              | +                                       | +                                 | +                                                   | +                                                | -                                    | +                                                |
| glucokinase                                               | +                              | +                                       | +                                 | +                                                   | +                                                | +                                    | +                                                |
| L-lactate<br>dehydrogenase                                | +                              | +                                       | +                                 | +                                                   | +                                                | +                                    | +                                                |
| acetolactate synthase                                     | +                              | +                                       | +                                 | +                                                   | +                                                | +                                    | +                                                |
| 2-oxoglutarate/2-<br>oxoacid ferredoxin<br>oxidoreductase | +                              | +                                       | +                                 | +                                                   | +                                                | +                                    | +                                                |
| acetaldehyde<br>dehydrogenase                             | +                              | +                                       | +                                 | -                                                   | +                                                | +                                    | +                                                |
| acetyl-CoA synthetase                                     | +                              | -                                       | -                                 | -                                                   | -                                                | -                                    | -                                                |
| acetyl-CoA<br>carboxylase/biotin<br>carboxylase           | +                              | +                                       | +                                 | +                                                   | +                                                | +                                    | +                                                |
| enoyl-CoA hydratase                                       | +                              | -                                       | -                                 | -                                                   | -                                                | -                                    | -                                                |
| acyl-CoA<br>dehydrogenase                                 | +                              | +                                       | -                                 | -                                                   | +                                                | -                                    | -                                                |
